# Supplementary material
Source: MDPI journal article supplement (https://www.mdpi.com/2073-4344/13/6/982)
Supplement: s1 [file s1]

## **Supplementary Materials**

### **Mild Dealumination of H-ZSM-5 Zeolite for Enhanced Conversion of Glucose into 5-Hydroxymethylfurfural in a Biphasic Solvent System**

Oluwaseyi Ojelabi<sup>a,b</sup>, Satit Yousatit<sup>b</sup>, Umer Rashid<sup>b,c</sup>, Chawalit Ngamcharussrivichai<sup>b,d,\*</sup>

<sup>a</sup> Program in Petrochemistry and Polymer Science, Faculty of Science, Chulalongkorn University, Pathumwan, Bangkok 10330, Thailand

<sup>b</sup> Center of Excellence in Catalysis for Bioenergy and Renewable Chemicals (CBRC), Faculty of Science, Chulalongkorn University, Pathumwan, Bangkok 10330, Thailand

<sup>c</sup> Institute of Nanoscience and Nanotechnology (ION2), Universiti Putra Malaysia, Serdang 43400, Selangor, Malaysia

<sup>d</sup> Center of Excellence on Petrochemical and Materials Technology (PETROMAT), Chulalongkorn University, Pathumwan, Bangkok 10330, Thailand

\*Corresponding author. Tel.: +66 2218 7528; fax: +66 2255 5831.

E-mail address: Chawalit.Ng@Chula.ac.th (C. Ngamcharussrivichai)

**Table S1** Fractions of Al species in the parent and dealuminated H-ZSM-5 catalysts

| Catalyst        | Al <sup>IV</sup> <sup>a</sup> |              | Al <sup>V</sup> <sup>b</sup> |              | Al <sup>VI</sup> <sup>c</sup> |              | Distorted EFAL <sup>d</sup> |              | Total peak area |
|-----------------|-------------------------------|--------------|------------------------------|--------------|-------------------------------|--------------|-----------------------------|--------------|-----------------|
|                 | Peak area                     | Fraction (%) | Peak area                    | Fraction (%) | Peak area                     | Fraction (%) | Peak area                   | Fraction (%) |                 |
| Parent H-ZSM-5  | 2823580                       | 62.96        | 539993                       | 12.04        | 750786                        | 16.74        | 370188                      | 8.25         | 4484547         |
| 0.1DeAl.H-ZSM-5 | 3512800                       | 63.11        | 793055                       | 14.25        | 793055                        | 14.25        | 467586                      | 8.40         | 5566497         |

<sup>a</sup> Tetrahedral Al species at 54 ppm<sup>b</sup> Pentahedral Al species at 37 ppm<sup>c</sup> Octahedral Al species at 0 ppm<sup>d</sup> Distorted EFAL at -30 ppm**Table S2** Fractions of Si species in the parent and dealuminated H-ZSM-5 catalysts

| Catalyst        | Si(0Al) <sup>a</sup> |              | Si(1Al) <sup>b</sup> |              | Si(2Al) <sup>c</sup> |              | Si(3Al) <sup>d</sup> |              | Total peak area |
|-----------------|----------------------|--------------|----------------------|--------------|----------------------|--------------|----------------------|--------------|-----------------|
|                 | Peak Area            | Fraction (%) |                 |
| Parent H-ZSM-5  | 229551               | 37.79        | 250494               | 41.24        | 101948               | 16.79        | 25380                | 4.18         | 607372          |
| 0.1DeAl.H-ZSM-5 | 236797               | 36.76        | 256296               | 39.79        | 104601               | 16.24        | 46446                | 7.21         | 644140          |

<sup>a</sup> Si bonded with no Al atom or Si(OSi)<sub>4</sub> species at -111 ppm<sup>b</sup> Si bonded to one Al atom or Si(OSi)<sub>3</sub>(OH) in the range of -104 to -105 ppm<sup>c</sup> Si bonded to two Al atoms or Si(OSi)<sub>2</sub>(OH)<sub>2</sub> in the range of -92 to -95 ppm<sup>d</sup> Si bonded to three Al atoms or Si(OSi)(OH)<sub>3</sub> in the range of -84 to -85 ppm

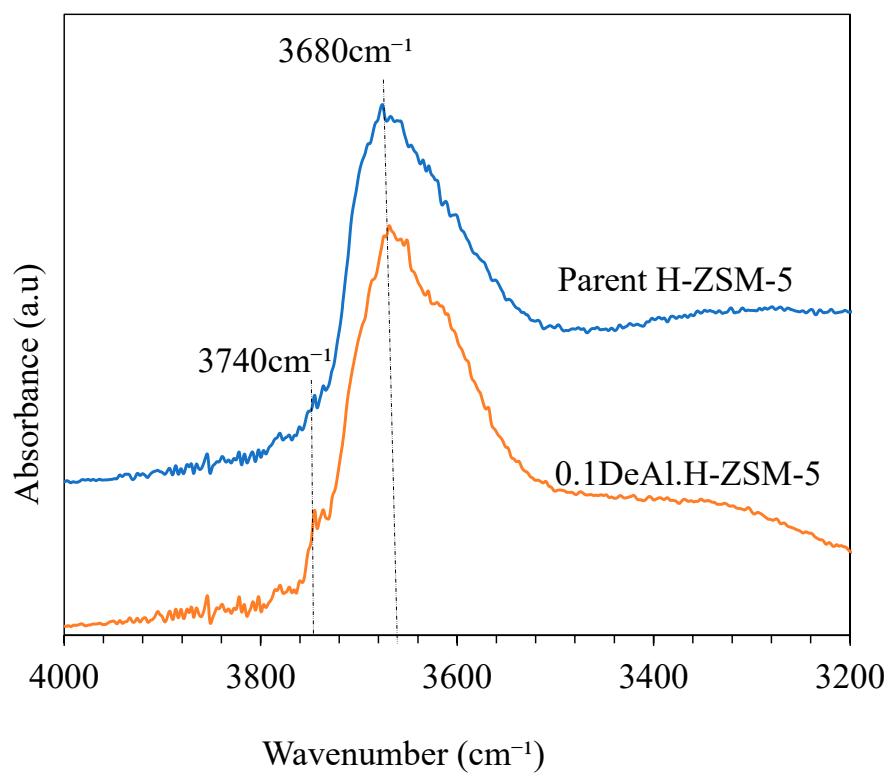

**Figure S1** FTIR spectra of the parent H-ZSM-5 and 0.1DeAl.H-ZSM-5  
in the O–H stretching region.

**Table S3** Glucose conversion and HMF yield obtained over different zeolite-based acid catalysts

| Entry | Catalyst        | Solvent                   | Temperature<br>(°C) | Time (h) | Glucose<br>conversion (%) | HMF yield<br>(%) | Reference |
|-------|-----------------|---------------------------|---------------------|----------|---------------------------|------------------|-----------|
| 1     | H-ZSM-5         | NaCl-H <sub>2</sub> O/THF | 160                 | 1.5      | 94.0                      | 61.0             | [19]      |
| 2     | H-ZSM-5         | H <sub>2</sub> O/Dioxane  | 120                 | 24       | 59.4                      | 17.0             | [50]      |
| 3     | H-ZSM-5         | H <sub>2</sub> O/MIBK     | 195                 | 0.5      | 80.0                      | 42.0             | [20]      |
| 4     | H-ZSM-5         | [BMIM]Cl                  | 130                 | 1        | n.d. <sup>a</sup>         | 15.3             | [52]      |
| 5     | Cr-ZSM-5        | [BMIM]Cl                  | 130                 | 1        | n.d.                      | 11.2             | [52]      |
| 6     | Cu-Cr-ZSM-5     | DMSO                      | 140                 | 4        | 57.5                      | 50.4             | [53]      |
| 7     | H-Beta-Cal750   | H <sub>2</sub> O-DMSO/THF | 180                 | 3        | 78.0                      | 43.0             | [43]      |
| 8     | Sn-β-F, HCl     | NaCl-H <sub>2</sub> O/THF | 190                 | 1.1      | 90.0                      | 53.0             | [51]      |
| 9     | H-USY           | [BMIM]Cl                  | 130                 | 1        | n.d.                      | 21.5             | [52]      |
| 10    | H-USY           | NaCl-H <sub>2</sub> O/THF | 170                 | 1        | 98.6                      | 48.8             | This work |
| 11    | 0.1DeAl.H-ZSM-5 | NaCl-H <sub>2</sub> O/THF | 170                 | 1        | 99.0                      | 64.7             | This work |

<sup>a</sup> n.d. means no data.
